# Supplementary material for: Membrane association but not identity is required for LRRK2 activation and phosphorylation of Rab GTPases
Source: PubMed Central journal article supplement — J Cell Biol. 2019 Oct 17;218(12):4157–70. doi: 10.1083/jcb.201902184 (PMC6891090; doi:10.1083/jcb.201902184), 2019-10-17
Supplement: JCB_201902184_sm.pdf [file JCB_201902184_sm.pdf]

## Supplemental material

Gomez et al., <https://doi.org/10.1083/jcb.201902184>

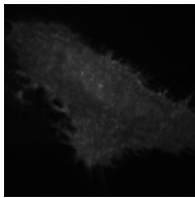

Video 1. Confocal Z-series of the HeLa cell shown in Fig. 8 E expressing PM-GBP, GFP-R1441G LRRK2, and Myc-Rab10 to illustrate the localization of plasma membrane-anchored LRRK2 detected in the GFP channel. The video was created at 3 frames per second.

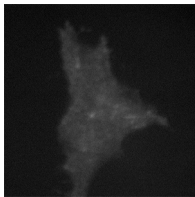

Video 2. Confocal Z-series of the A549 Rab10 knockout cell shown in Fig. 9 B expressing GFP-R1441G LRRK2, Myc-GBP, and PM-Rab10 to illustrate the localization of plasma membrane-anchored Rab10 distribution detected in the 647-nm channel. The video was created at 3 frames per second.
